# Supplementary material
Source: PubMed Central journal article supplement (PMC9968689)

## Online Resource 2

| Model     | GSE       | No. of timepoints | Culture time course |                   |         |         |  |
|-----------|-----------|-------------------|---------------------|-------------------|---------|---------|--|
|           |           |                   | t = 0 days          | 7 days            | 14 days | 21 days |  |
| Insert    | GSE7259   | 2                 |                     |                   |         |         |  |
|           | GSE15636  | 2                 |                     |                   |         |         |  |
|           | GSE17625  | 6                 |                     |                   |         |         |  |
|           | GSE21976  | 2                 | ???                 |                   |         |         |  |
|           | GSE30292  | 1                 |                     |                   |         |         |  |
|           | GSE30364  | 1                 |                     |                   |         |         |  |
|           | GSE65790  | 1                 |                     | Time not reported |         |         |  |
|           | GSE81867  | 1                 |                     |                   |         |         |  |
|           | GSE115022 | 1                 |                     |                   |         |         |  |
|           | GSE156269 | 1                 |                     |                   |         |         |  |
|           | GSE158620 | 1                 |                     |                   |         |         |  |
|           | GSE173729 | 1                 |                     |                   |         |         |  |
|           | Chip      | GSE65790          | 1                   |                   |         |         |  |
|           |           | GSE79383          | 1                   |                   |         |         |  |
| GSE156269 |           | 1                 |                     |                   |         |         |  |
| GSE158620 |           | 1                 |                     |                   |         |         |  |

= reported as preconfluent    
 /  = static vs. dynamic    
 /  = oxic vs. anoxic apical compartment    
 = co-culture with (eukaryotic) cells    
 = exposure to microbiota

## Online Resource 3

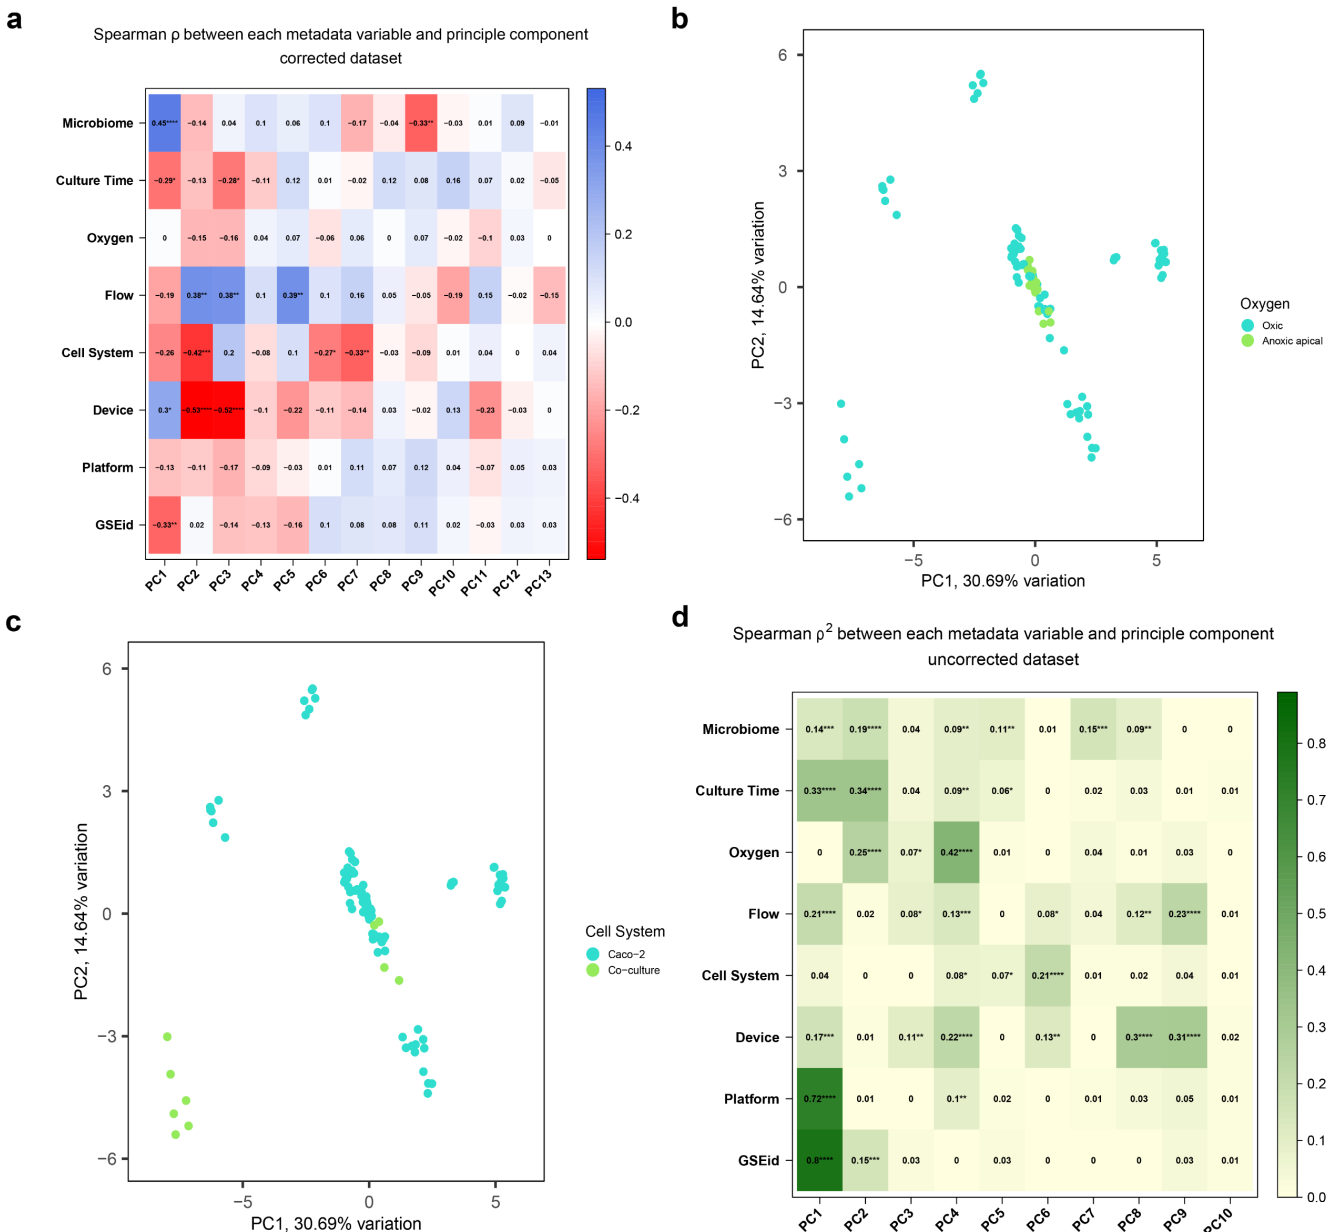

# Online Resource 4

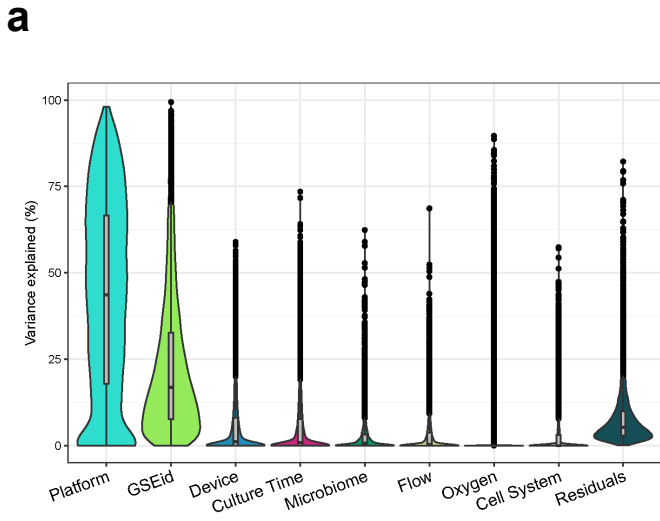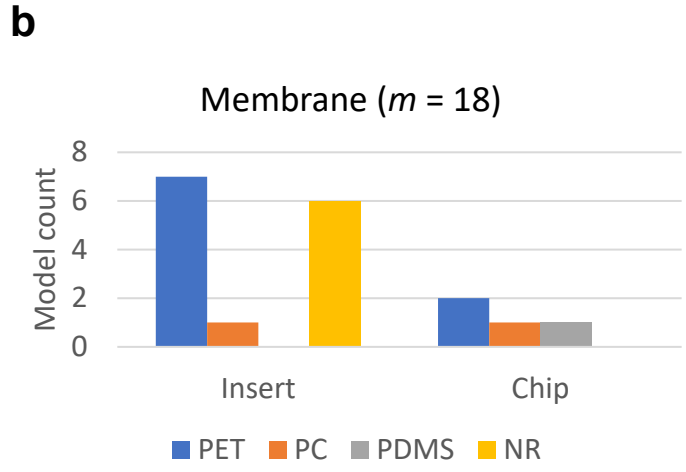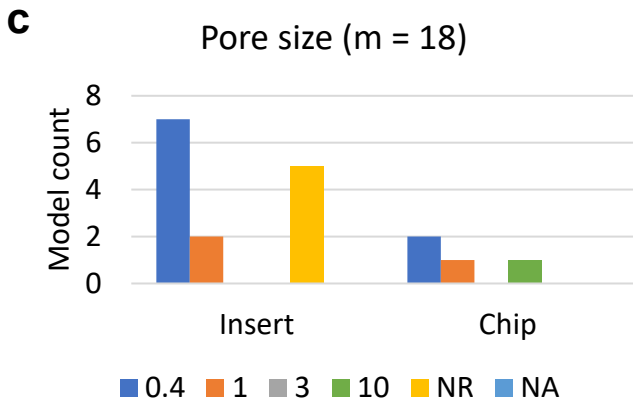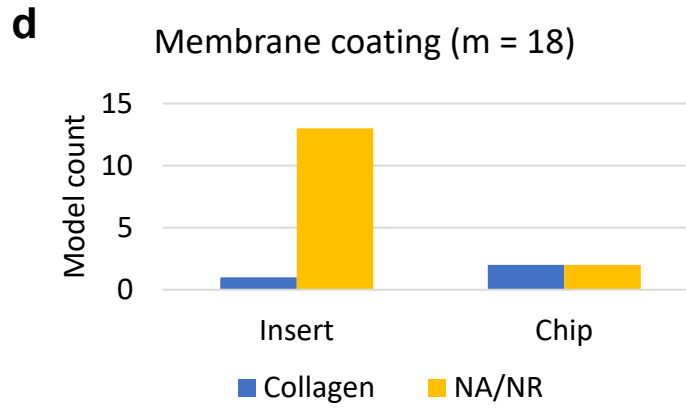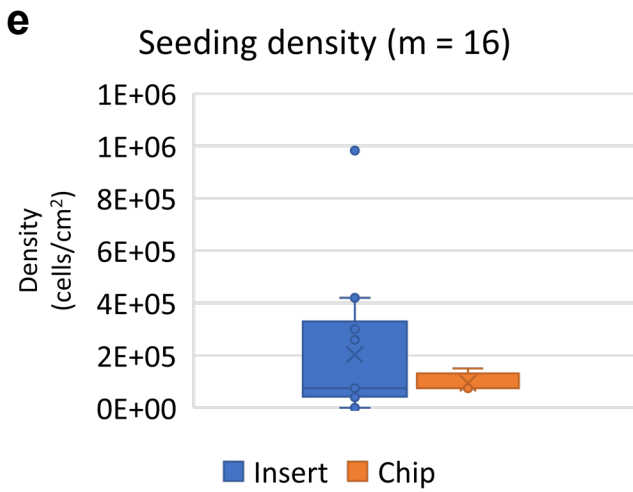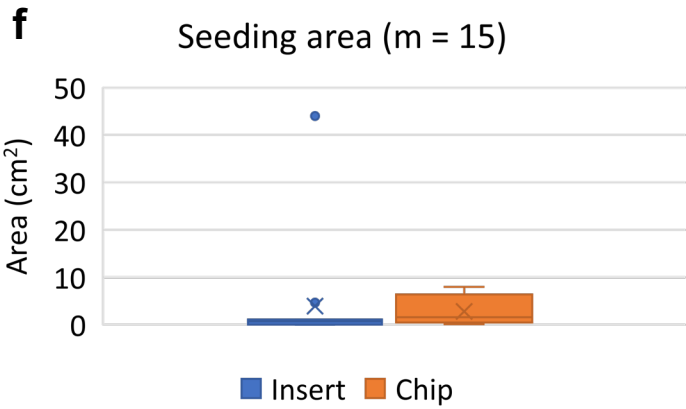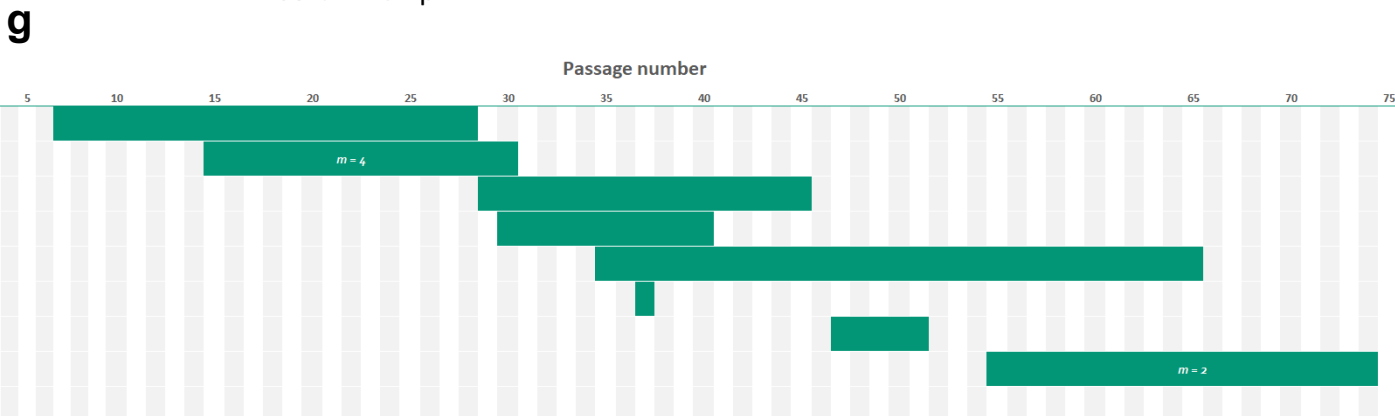

Supplement: 204_2022_3430_MOESM2_ESM.pdf [file 204_2022_3430_MOESM2_ESM.pdf]
